# Supplementary material for: Transcriptome Analysis Reveals the Essential Role of the Domesticated Gag Gene of Drosophila LTR Retrotransposons, Gagr, in the Modulation of Immune Response
Source: Preprints.org preprint supplement (doi:10.20944/preprints202310.1510.v1), 2023-10-24
Supplement: Supplementary file 1 [file supplementary]

## Sheet: round 1
	cycles										relative expression
	Tub	rp49	TotA	TotC	AttB	CecA2	Socs16D	Spn88Eb	CG33346	Gagr	TotA	TotC	AttB	CecA2	Socs16D	Spn88Eb	CG33346	Gagr
	21.55	24.22	25.38	27.82	30.89	28.9	25.85	24.31	26.1	31.37	0.17739	0.0326902	0.00389274	0.0154634	0.12807	0.372419	0.107693	0.002791
	22.38	25.24	26.01	28.53	32.78	29.62	28.24	26.89	28.51	32.58	0.217638	0.0379436	0.00199416	0.0178244	0.0463914	0.118257	0.0384733	0.00229069
	21.33	23.83	24.19	26.66	29.9	28.78	26.03	24.5	26.8	30.93	0.327598	0.0591286	0.00625836	0.0136024	0.0915054	0.264255	0.0536603	0.00306478
	20.99	23.64	23.5	25.68	29.31	27.46	25.35	23.77	26.71	30.07	0.439825	0.0970586	0.00783962	0.0282619	0.122004	0.364755	0.0475306	0.00462927
	19.65	22.33	23.79	26.29	26.47	25.74	23.54	22.1	24.95	28.55	0.143587	0.0253829	0.0224056	0.0371627	0.170755	0.463294	0.0642571	0.00529924
w1118 x tub m	21.05	23.7	18.72	20.9	31.4	28.76	24.69	24.53	25.46	28.48	12.5969	2.77984	0.00191957	0.0119653	0.200963	0.224533	0.117848	0.0145282
	20.66	22.76	20.66	23.81	30.88	28.79	24.17	23.78	24.66	27.54	2.07053	0.233258	0.00173602	0.00739108	0.181747	0.238159	0.129408	0.017579
	22.29	25.68	21.82	25.09	36.33	31.59	27.58	26.62	26.58		4.48466	0.464902	0.000192214	0.0051365	0.0827556	0.160985	0.165511
	22.47	25.11	21.48	24.02	33.07	30.47	26.6	25.97	26.78	29.76	4.95883	0.852635	0.00160858	0.00975258	0.142595	0.220676	0.125869	0.0159533
	21.32	24.04	20.63	23.32	30.8	28.94	25.25	24.35	25.5	28.61	4.14106	0.641713	0.00359448	0.0130482	0.168404	0.314253	0.14161	0.0164018
	21.68	24.31	21.82	24.77	33.13	30.31	25.73	25.82	26.41	29.73	2.25793	0.292194	0.000889326	0.00628009	0.150205	0.141121	0.0937524	0.00938778
	21.8	24.78	21.79	24.96	35.41	31.81	25.75	25.85	26.13	30.34	2.82843	0.314253	0.000224655	0.00272411	0.181747	0.169576	0.139661	0.00754638
	22.39	24.6	23.3	26.66	35.5	31.61	26.7	26.6	26.92	29.99	1.14472	0.111491	0.000243296	0.00360696	0.108442	0.116226	0.0931048	0.0110869
VDRC x tub f	22.98	25.04	29.49	29.68	38.16	33.17	30.49	29.65	30.91		0.0224056	0.0196408	5.5008e-05	0.0017481	0.0112028	0.0200535	0.00837323
	23.94	26.77	29.39	29.63	37.05	32.73	32.74	30.73	31.25		0.061002	0.0516531	0.000301616	0.00602426	0.00598265	0.024097	0.0168046
	22.25	25.45	28.49	28.94	37.03	30.82	29.65	30.11	30.29		0.0401071	0.0293601	0.000107752	0.00797666	0.0179484	0.0130482	0.0115177
	23.84	26.84	28.53	28.64	34.55	30.11	33.34	29.44	31.71	39	0.109576	0.101532	0.00168855	0.0366511	0.00390625	0.0583146	0.0120904	7.72557e-05
	20.74	22.48	24.73	26.57	31.69	28.84	24.14	26.79	28.44	32.92	0.115023	0.0321286	0.000923884	0.00666121	0.173139	0.0275845	0.00878952	0.000393868
	21.75	22.83	26.02	27.57	32.81	29.03	25.05	26.96	28.22	32.59	0.075363	0.0257372	0.000681027	0.0093553	0.147624	0.0392817	0.0164018	0.000793215
	21.68	22.71	26.76	27.93	36.12	31.16	26.1	28.22	29.92	33.58	0.0422472	0.0187756	6.42921e-05	0.00200109	0.0667541	0.0153566	0.00472654	0.000373916
w1118 x tub f	22.65	25.69	27.87	29.28	39	32.84	29.49	28.6	28.11	33.1	0.0769465	0.0289559	3.43341e-05	0.0024551	0.0250334	0.0463914	0.0651541	0.00205023
	21.57	24.79	27.01	28.88	38.27	30.96	27.19	27.06	27.22	33.08	0.0703162	0.0192366	2.8672e-05	0.00454974	0.0620683	0.0679209	0.0607909	0.00104665
	21.93	24.65	26.83	28.33	37.18	32.93	27.69	27.68	27.11	31.78	0.0859714	0.0303955	6.58709e-05	0.00125335	0.0473661	0.0476956	0.0708052	0.00278135
	21.08	22.81	24.53	27.6	31.33	28.43	23.05	26.08	26.62	29.68	0.166662	0.0198461	0.00149566	0.011164	0.464902	0.0569169	0.0391458	0.00469389
	21.77	23.85	26.57	29.01	34.81	29.3	24.21	27.29	26.6	30.56	0.073812	0.0136024	0.000244141	0.0111254	0.378929	0.0448111	0.072293	0.00464534
	22.07	23.91	26.81	29.06	37.51	30.17	25.17	28.26	27.45	31.56	0.0708052	0.014885	4.25642e-05	0.00689612	0.220676	0.0259162	0.0454366	0.00263132
	20.94	22.44	27.04	29.55	36.19	31.19	23.1	26.84	27.35	30.56	0.0245183	0.00430432	4.31584e-05	0.00138107	0.376312	0.0281641	0.0197774	0.00213729
	21.89	23.62	25.32	27.94	34.99	29.5	24.43	26.78	26.74	30.89	0.168989	0.027489	0.000207443	0.00932294	0.313166	0.0614263	0.0631532	0.0035573
	21.12	22.75	26.23	28.78	32.82	28.99	23.76	26.75	26.75	30.52	0.050942	0.00869861	0.000528796	0.00752027	0.282241	0.0355255	0.0355255	0.0026041

## Sheet: round 2
	cycles									relative expression
	Tub	rp49	Nazo	Ppo1	Spn28Dc	CG1304	CG10232	Ser6	CG10051	Nazo	Ppo1	Spn28Dc	CG1304	CG10232	Ser6	CG10051
VDRC x tub m	22.48	22.83	31.7	25.93	26.89	25.49	32.5	26.16	30.67	0.00189314	0.103306	0.0531053	0.140146	0.00108733	0.0880825	0.00386585
	22.04	22.14	31.64	25.88	26.95	25.22	32.07	25.43	30.63	0.00133402	0.072293	0.0344345	0.114229	0.000990195	0.0987552	0.00268661
	22.31	23.15	32.23	26.51	27.53	26.08	33.09	26.22	31.67	0.00138107	0.0727958	0.0358968	0.098073	0.000760903	0.0890031	0.00203607
	22.02	21.97	31.19	25.85	27.6	25.7	32.06	25.2	31.33	0.0017062	0.0691082	0.020546	0.0766803	0.00093354	0.108442	0.00154841
	20.91	21.08	30.27	24.53	25.67	24.84	30.85	24.18	29.53	0.00161416	0.0862698	0.0391458	0.0695889	0.00107982	0.109956	0.00269593
w1118 x tub m	20.2	22.09	31.05	23.9	26.62	27.06	32.96	26.68	30.64	0.00104303	0.148137	0.0224833	0.0165732	0.000277543	0.0215675	0.00138586
	20.74	22.06	30.86	23.88	26.84	27.65	31.8	27.73	30	0.0014199	0.179244	0.0230355	0.013139	0.000740096	0.0124303	0.00257716
	22.37	22.51	32.11	24.94	27.56	29.35	33.1	28.64	31.89	0.00122755	0.176777	0.0287559	0.00831539	0.000618045	0.0136024	0.00142977
	21.49	22.74	31	26.1	28	28.32	35.95	27.67	31.16	0.00211519	0.0631532	0.0169215	0.0135553	6.84305e-05	0.0212705	0.00189314
	19.94	21.42	28.68	22.77	25.22	26.54	31.08	26.63	29.41	0.00390625	0.234881	0.0429857	0.0172173	0.000740096	0.016176	0.00235509
	22.54	22.62	32.7	25.89	27.51	28.98	35.07	29.07	31.8	0.000898621	0.10083	0.0328036	0.0118415	0.000173834	0.0111254	0.00167689
	22.05	22.29	30.01	25.56	27.58	28.73	32.05	28	31.63	0.0043644	0.0953912	0.0235195	0.0105985	0.00106126	0.017579	0.0014199
VDRC x tub f	22.71	21.95	38.25	31.16	30.54	28.57	0	28.58	33.62	1.61288e-05	0.00219738	0.0033771	0.0132304	0	0.013139	0.000399366
	21.68	20.92	31.67	28.24	29.03	27.84	36.65	26.98	32.57	0.000755647	0.00814426	0.00471019	0.0107464	2.39436e-05	0.0195052	0.000404941
	22.08	21.15	32.03	28.32	28.31	27.88	34.58	27.24	33.02	0.000732441	0.00958504	0.00965171	0.0130031	0.000125068	0.0202631	0.000368768
	20.59	20.93	32.08	28	28.12	26.17	34.7	25.85	31.22	0.000391147	0.0066152	0.00608722	0.0235195	6.36271e-05	0.0293601	0.000709948
	20.55	20.89	30.12	26.98	26.94	25.47	32.75	24.71	30.15	0.00148019	0.0130482	0.0134151	0.0371627	0.000239116	0.0629347	0.00144973
	23.06	20.21			26.82	24.33	32.84	24.13	29.51			0.027489	0.154427	0.000423603	0.17739	0.0042598
	23.01	21.63			28.73	26.26	34.7	26.07	32.55			0.0117597	0.0651541	0.000187607	0.0743254	0.000832651
w1118 x tub f	21.13	22.65	30.89	26.58	27.54	27.72	33.39	27.21	29.72	0.00195313	0.0387409	0.019915	0.017579	0.000345267	0.0250334	0.00439476
	20.7	22.1	29.94	25.97	28.21	27.5	35.15	26.84	30.94	0.00268661	0.042101	0.00891222	0.0145786	7.25834e-05	0.0230355	0.0013433
	19.94	21.23	29.55	25.61	28.04	27.28	34.85	26.72	29.85	0.00200109	0.0307131	0.0056993	0.00965171	5.07934e-05	0.0142292	0.00162539
	20.73	22.14	29.06	25.77	27.63	27.71	35.85	26.82	30.2	0.00506578	0.049549	0.0136496	0.0129133	4.57776e-05	0.0239306	0.00229865
	20.6	21.76	28.5	25.8	27.06	28.16	36.33	27.46	30.92	0.00625836	0.0406669	0.0169802	0.00792156	2.7504e-05	0.0128686	0.00116941
	21.56	20.54			26.83	27.12	32.7	27.04	29.55			0.018199	0.014885	0.000311172	0.0157337	0.00276214
	21.58	20.84			28.78	28.7	34.77	27.9	31.08			0.00526263	0.0055627	8.28006e-05	0.00968522	0.00106865
	22.04	20.5			28.8	28.86	0	28.94	32.99			0.00541058	0.00519018	0	0.00491021	0.000296434
